# Supplementary material for: High risk of tobacco-related cancers in CDKN2A mutation-positive melanoma families
Source: HighWire-hosted journal article supplement (doi:10.1136/jmedgenet-2014-102320), 2014-06-16
Supplement: jmedgenet-2014-102320supp.pdf [file jmedgenet-2014-102320supp.pdf]

## Supplementary Materials and Methods

### DNA isolation, PCR and Direct Sequencing of PCR products

Peripheral blood mononuclear cells (PBMCs) were isolated from 8 ml of venous blood and DNA extracted with FlexiGene DNA kit (Qiagen, Hilden, Germany) according to the manufacturer's instructions. Exons 1 $\alpha$ , 1 $\beta$ , 2 and 3 of CDKN2A to give PCR fragments of 340 bp, 678 bp, 576 bp and 319 bp for exons 1 $\alpha$ , 1 $\beta$ , 2 and 3, respectively. PCR conditions were: initial denaturation and DNA polymerase activation at 95° C for 6 min followed by 40 cycles of 95° C for 10 sec, 61° C, 59° C, 60° C or 62° C (for exons 1 $\alpha$ , 2 and 3, respectively) for 20 sec and 72° C for 30 sec. The cycling was followed by 5 min. incubation at 72° C then soak at 4° C. The PCRs consisted of 1X PCR buffer, 0.2 mM dNTPs, 1.5 mM MgCl<sub>2</sub>, 1 U of Platinum Taq polymerase (all reagents from Invitrogen, Carlsbad, CA), 1 M of betaine (exons 1 $\alpha$  and 2) or 5% of DMSO (exon 3) (both Sigma-Aldrich Chemie GmbH, Steinheim, Germany), or no additives with 20 pmoles of each primer (Eurofins-MWG GmbH, Ebersberg, Germany) and 50 ng of genomic DNA in a total volume of 20  $\mu$ l. Exon 1  $\beta$  PCR was run using the PCRx Enhancer System™ (Invitrogen, Carlsbad, CA) at final PCRx Enhancer solution concentration of 1X, in 1X PCRx Amplification buffer, 0.2 mM dNTPs, 1.5 mM MgSO<sub>4</sub>, 30 pmoles of each primer and 3 U of Platinum Taq polymerase (all reagents Invitrogen, Carlsbad, CA) with PCR conditions as above except with an annealing temperature at 56° C. 3  $\mu$ l of each PCR product was run on a 1.6 % agarose gel to confirm PCR specificity. Ten  $\mu$ l of the PCR product was purified using 2 U of exonuclease I and 1 U of FastAP alkaline phosphatase (both Thermo Fisher Scientific, Gothenburg, Sweden). The purification conditions were 50 min at 37° C followed by 20 min at 80° C then soak at 4° C. 0.5 to 1.0  $\mu$ l of the purified PCR corresponding to approximately 25 to 50 ng of PCR product was used in a sequencing reaction utilizing Applied Biosystems BigDye Terminator Cycle Sequencing Kit version 1.1 according to a 1:4 protocol with 1  $\mu$ l of BigDye Terminator™ in a final 0.75X BigDye Terminator sequencing buffer (reagents Applied Biosystems, Foster City, CA) and 4 pmole of each primer (Eurofins-MWG GmbH, Ebersberg, Germany) in total volume of 10  $\mu$ l. The sequencing

reactions were analyzed in ABI Prism® 3700 genetic analyzer (Applied Biosystems, Foster City, CA) All PCR products were sequenced bi-directionally, with analyses of electropherograms using Mutation Surveyor v.3.97 software (Softgenetics LLC, State College, PA).

Supplementary Table 1. Sex and age distribution in the study cohorts

|                      | Sex, males/females (%) | Median year of birth |
|----------------------|------------------------|----------------------|
| p.Arg112dup families | 51/49                  | 1957                 |
| Carriers             | 47/53                  | 1959                 |
| FDRs                 | 52/48                  | 1955                 |
| SDRs                 | 53/47                  | 1957                 |
| Control population   | 51/49                  | 1959                 |
| Controls             | 47/53                  | 1959                 |
| cFDRs*               | 51/49                  | 1958                 |
| cSDRs†               | 50/50                  | 1960                 |

\*cFDRs=first degree relatives of controls and

†cSDRs=second degree relatives of controls.

Supplementary Table 2. Specification of all cancer occurrences in table 4 and RRs in *CDKN2A* p.Arg112dup kindreds (carriers, FDRs and SDRs) compared to controls

| Types of cancer              | Carriers<br>n=120 | FDR<br>n=275 | SDR<br>n=321 | Controls<br>n=3976 | p.Arg112dup fam vs. Ctrl<br>RR (95% CI) |
|------------------------------|-------------------|--------------|--------------|--------------------|-----------------------------------------|
| Breast                       | 4                 | 8            | 7            | 62                 | 1.7 (1.0-2.8)                           |
| Central nervous system       | 1                 | 3            |              | 21                 | 1.0 (0.4-3.0)                           |
| Astrocytoma                  | 1                 |              |              | 6                  | 0.9 (0.1-7.5)                           |
| Craniopharyngioma            |                   |              |              | 4                  | 0                                       |
| Meningioma                   |                   | 2            |              | 5                  | 2.2 (0.4-11.2)                          |
| Neurinoma                    |                   |              |              | 3                  | 0                                       |
| Ocular tumor (non melanoma)  |                   |              |              | 3                  | 0                                       |
| Unspecified                  |                   | 1            |              |                    | 0                                       |
| Connective tissue            |                   | 1            | 1            | 5                  | 2.2 (0.4-11.2)                          |
| Mesothelioma                 |                   |              | 1            | 1                  | 5.4 (0.3-8.7)                           |
| Sarcoma                      |                   | 1            |              | 4                  | 1.4 (0.2-12.2)                          |
| Digestive -lower             | 2                 | 5            | 2            | 64                 | 0.8 (0.4-1.5)                           |
| Large Intesitine             | 1                 | 2            | 1            | 41                 | 0.5 (0.2-1.5)                           |
| Rectum                       | 1                 | 3            | 1            | 19                 | 1.4 (0.5-3.8)                           |
| Small intestine and appendix |                   |              |              | 4                  | 0                                       |
| Digestive -upper             | 15                | 20           | 9            | 42                 | 5.7 (3.7-8.7)                           |
| Tongue and oral cavity       | 5                 | 1            |              | 7                  | 4.7 (1.6-13.9)                          |
| Pharynx                      |                   |              | 1            | 1                  | 5.4 (0.3-8.7)                           |
| Esophagus                    | 2                 | 1            |              | 3                  | 5.4 (1.1-27.0)                          |
| Stomach                      | 1                 | 4            | 2            | 15                 | 2.5 (1.0-6.2)                           |
| Pancreas                     | 7                 | 13           | 3            | 9                  | 13.9 (6.4-30.1)                         |
| Liver                        |                   |              | 2            | 4                  | 2.7 (0.5-14.9)                          |
| Gall bladder                 |                   | 1            | 1            | 1                  | 10.9 (0.9-12.0)                         |
| Endocrine                    | 2                 | 4            |              | 20                 | 1.6 (0.7-4.1)                           |
| Adrenal gland                | 1                 |              |              |                    | 0                                       |
| Carcinoid                    |                   | 1            |              | 4                  | 1.4 (0.2-12.2)                          |
| Hypophysis                   |                   |              |              | 3                  | 0                                       |
| Malignant thymoma            |                   |              |              | 1                  | 0                                       |
| Neuroendocrine tumor         |                   |              |              | 1                  | 0                                       |
| Parathyroid                  |                   | 3            |              | 6                  | 2.7 (0.7-10.9)                          |
| Thyroid                      | 1                 |              |              | 5                  | 1.1 (0.1-9.3)                           |
| Gynecological                | 11                | 7            | 8            | 98                 | 1.5 (1.0-2.3)                           |
| Cervix                       | 9                 | 5            | 7            | 74                 | 1.5 (1.0-2.6)                           |
| Ovaries and salpinges        | 2                 |              | 1            | 13                 | 1.3 (0.4-11.2)                          |
| Endometrium                  |                   | 2            |              | 5                  | 2.2 (0.4-11.2)                          |
| Vagina and vulva             |                   |              |              | 6                  | 0                                       |
| Hematopoietic or Lymphatic   | 4                 | 2            | 2            | 27                 | 1.6 (0.7-3.5)                           |
| Leukemia                     | 2                 |              | 2            | 10                 | 2.2 (0.7-6.9)                           |
| Lymphoma                     | 2                 |              |              | 13                 | 0.8 (0.2-3.8)                           |
| Myeloma                      |                   |              |              | 4                  | 0                                       |
| Unknown primary tumor        |                   | 3            |              | 17                 | 1.0 (0.3-3.3)                           |
| Respiratory                  | 6                 | 9            | 5            | 23                 | 4.7 (2.4-8.7)                           |
| Larynx                       | 2                 | 2            |              | 1                  | 21.8 (2.4-194.7)                        |
| Lung and bronchi             | 4                 | 7            | 5            | 22                 | 4.0 (2.1-7.5)                           |
| Skin                         | 64                | 32           | 8            | 61                 | 9.3 (6.8-12.8)                          |
| Melanoma                     | 60                | 28           | 8            | 21                 | 24.6 (15.3-40.0)                        |
| Basal cell carcinoma         |                   |              |              | 2                  | 0                                       |
| Squamous cell skin cancer    | 4                 | 4            |              | 37                 | 1.2 (0.5-2.5)                           |
| Skin adnexal tumors          |                   |              |              | 3                  | 0                                       |
| Urinary                      | 3                 | 8            | 12           | 107                | 1.2 (0.7-1.8)                           |
| Kidney                       | 1                 |              | 4            | 16                 | 1.7 (0.6-4.6)                           |
| Urinary bladder and ureters  |                   | 1            | 1            | 23                 | 0.5 (0.1-2.0)                           |
| Prostate                     | 2                 | 7            | 7            | 64                 | 1.4 (0.8-2.4)                           |
| Testis                       |                   |              |              | 4                  | 0                                       |

Supplementary Table 3. Cumulative incidence for each age group in *CDKN2A* p.Arg112dup carriers.

|                                 | 10y  | 20y  | 30y  | 40y  | 50y  | 60y  | 70y  | 80y  |
|---------------------------------|------|------|------|------|------|------|------|------|
| Non melanoma cancers            | 0.00 | 0.00 | 0.03 | 0.12 | 0.20 | 0.31 | 0.44 | 0.76 |
| Respiratory and upper digestive | 0.00 | 0.00 | 0.00 | 0.02 | 0.07 | 0.10 | 0.16 | 0.53 |
